CORRECTION

# Correction: Ruminant Transcriptomic Analysis of Grass-Fed and Grain-Fed Angus Beef Cattle

Yaokun Li, José A. Carrillo, Yi Ding, YangHua He, Chunping Zhao, Linsen Zan, Jiuzhou Song

Supporting Information [S1 Fig](#) appears incorrectly in the published article. Please view the correct [S1 Fig](#) here.

## Supporting Information

**S1 Fig. Alignment of RNA-Seq reads to the Bovine Genome.**  
(TIF)

## Reference

1. Li Y, Carrillo JA, Ding Y, He Y, Zhao C, Zan L, et al. (2015) Ruminant Transcriptomic Analysis of Grass-Fed and Grain-Fed Angus Beef Cattle. PLoS ONE 10(6): e0116437. doi:[10.1371/journal.pone.0116437](https://doi.org/10.1371/journal.pone.0116437) PMID: [26090810](https://pubmed.ncbi.nlm.nih.gov/26090810/)

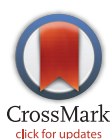

## OPEN ACCESS

**Citation:** Li Y, Carrillo JA, Ding Y, He Y, Zhao C, Zan L, et al. (2015) Correction: Ruminant Transcriptomic Analysis of Grass-Fed and Grain-Fed Angus Beef Cattle. PLoS ONE 10(7): e0134067. doi:[10.1371/journal.pone.0134067](https://doi.org/10.1371/journal.pone.0134067)

**Published:** July 21, 2015

**Copyright:** © 2015 Li et al. This is an open access article distributed under the terms of the [Creative Commons Attribution License](https://creativecommons.org/licenses/by/4.0/), which permits unrestricted use, distribution, and reproduction in any medium, provided the original author and source are credited.
